# Supplementary material for: 53BP1 deficiency leads to hyperrecombination using break-induced replication (BIR)
Source: PubMed Central journal article supplement — Nat Commun. 2024 Oct 5;15:8648. doi: 10.1038/s41467-024-52916-z (PMC11455893; doi:10.1038/s41467-024-52916-z), 2024-10-05

## Reporting Summary

Nature Portfolio wishes to improve the reproducibility of the work that we publish. This form provides structure for consistency and transparency in reporting. For further information on Nature Portfolio policies, see our [Editorial Policies](#) and the [Editorial Policy Checklist](#).

Please do not complete any field with "not applicable" or n/a. Refer to the help text for what text to use if an item is not relevant to your study.

For final submission: please carefully check your responses for accuracy; you will not be able to make changes later.

### Statistics

For all statistical analyses, confirm that the following items are present in the figure legend, table legend, main text, or Methods section.

n/a Confirmed

- The exact sample size ( $n$ ) for each experimental group/condition, given as a discrete number and unit of measurement
- A statement on whether measurements were taken from distinct samples or whether the same sample was measured repeatedly
- The statistical test(s) used AND whether they are one- or two-sided  
*Only common tests should be described solely by name; describe more complex techniques in the Methods section.*
- A description of all covariates tested
- A description of any assumptions or corrections, such as tests of normality and adjustment for multiple comparisons
- A full description of the statistical parameters including central tendency (e.g. means) or other basic estimates (e.g. regression coefficient) AND variation (e.g. standard deviation) or associated estimates of uncertainty (e.g. confidence intervals)
- For null hypothesis testing, the test statistic (e.g.  $F$ ,  $t$ ,  $r$ ) with confidence intervals, effect sizes, degrees of freedom and  $P$  value noted  
*Give  $P$  values as exact values whenever suitable.*
- For Bayesian analysis, information on the choice of priors and Markov chain Monte Carlo settings
- For hierarchical and complex designs, identification of the appropriate level for tests and full reporting of outcomes
- Estimates of effect sizes (e.g. Cohen's  $d$ , Pearson's  $r$ ), indicating how they were calculated

*Our web collection on [statistics for biologists](#) contains articles on many of the points above.*

### Software and code

Policy information about [availability of computer code](#)

Data collection

Data collection for cell viability assay was performed with Gene5 3.11 software; data collection for FACS was performed with BD Accuri C6 software; data collection for RT-qPCR was performed with IQ™5 Optical System software; data collection for PLA image was performed with Olympus Microscopy software; data collection for WB was performed with Biorad Gel Doc XR+ Imaging software.

Data analysis

CellProfiler 4.2.6 software, GraphPad Prism9 and Microsoft Excel

For manuscripts utilizing custom algorithms or software that are central to the research but not yet described in published literature, software must be made available to editors and reviewers. We strongly encourage code deposition in a community repository (e.g. GitHub). See the Nature Portfolio [guidelines for submitting code & software](#) for further information.

### Data

Policy information about [availability of data](#)

All manuscripts must include a [data availability statement](#). This statement should provide the following information, where applicable:

- Accession codes, unique identifiers, or web links for publicly available datasets
- A description of any restrictions on data availability
- For clinical datasets or third party data, please ensure that the statement adheres to our [policy](#)

The authors confirm that the data supporting the findings of this study are available within the article and/or its supplementary materials.

## Field-specific reporting

Please select the one below that is the best fit for your research. If you are not sure, read the appropriate sections before making your selection.

Life sciences  Behavioural & social sciences  Ecological, evolutionary & environmental sciences

For a reference copy of the document with all sections, see [nature.com/documents/nr-reporting-summary-flat.pdf](https://www.nature.com/documents/nr-reporting-summary-flat.pdf)

## Life sciences study design

All studies must disclose on these points even when the disclosure is negative.

|                 |                                                                                                                                            |
|-----------------|--------------------------------------------------------------------------------------------------------------------------------------------|
| Sample size     | No statistical method was used to predetermine sample sizes. For FACS analysis, sample size is 4/ 5. For PLA analysis, sample size is 300. |
| Data exclusions | No data exclusions.                                                                                                                        |
| Replication     | To verify the reproducibility of our findings, experiments were performed using at least 3 biological replicates.                          |
| Randomization   | N/A                                                                                                                                        |
| Blinding        | There was no blind setting, and the authors were aware of the status of the samples when conducting experiments.                           |

# Reporting for specific materials, systems and methods

We require information from authors about some types of materials, experimental systems and methods used in many studies. Here, indicate whether each material, system or method listed is relevant to your study. If you are not sure if a list item applies to your research, read the appropriate section before selecting a response.

## Materials & experimental systems

| n/a                                 | Involved in the study                                     |
|-------------------------------------|-----------------------------------------------------------|
| <input type="checkbox"/>            | <input checked="" type="checkbox"/> Antibodies            |
| <input type="checkbox"/>            | <input checked="" type="checkbox"/> Eukaryotic cell lines |
| <input checked="" type="checkbox"/> | <input type="checkbox"/> Palaeontology and archaeology    |
| <input checked="" type="checkbox"/> | <input type="checkbox"/> Animals and other organisms      |
| <input checked="" type="checkbox"/> | <input type="checkbox"/> Clinical data                    |
| <input checked="" type="checkbox"/> | <input type="checkbox"/> Dual use research of concern     |
| <input checked="" type="checkbox"/> | <input type="checkbox"/> Plants                           |

## Methods

| n/a                                 | Involved in the study                              |
|-------------------------------------|----------------------------------------------------|
| <input checked="" type="checkbox"/> | <input type="checkbox"/> ChIP-seq                  |
| <input type="checkbox"/>            | <input checked="" type="checkbox"/> Flow cytometry |
| <input checked="" type="checkbox"/> | <input type="checkbox"/> MRI-based neuroimaging    |

## Antibodies

### Antibodies used

Antibodies used for PLA include:  
 FLAG (F1804, Sigma-Aldrich), FLAG (AE004, Abclonal), HA (E10176EF, Covance), PCNA (SC-56, Santa Cruz), PCNA (10205, Proteintech), PCNA K164Ub (13439, Cell Signaling Technology), γH2AX (05636, Upstate), γH2AX (07164, Upstate), RAD51 (05-530-I, Santa Cruz).  
 Antibodies used for WB include:  
 53BP1 (NB100-305, Novus Biologicals), FLAG (F1804, Sigma-Aldrich), PCNA (SC-56, Santa Cruz), PCNA-K164ub (13439, Cell Signaling Technology), HA (E10176EF, Covance), PRIM1 (10773-1-AP, Proteintech), RPA2 (NA19L, Calbiochem), SMARCAD1 (A5850, Abclonal), and KU70 (E-5, SC-17789, Santa Cruz Biotechnology)

### Validation

FLAG (F1804, Sigma-Aldrich), WB 1:1000, PLA 1:250  
<https://www.sigmaaldrich.com/US/en/product/sigma/f1804>  
 FLAG (AE004, Abclonal), PLA 1:250  
<https://abclonal.com/catalog-antibodies/RabbitantiDDDDKTagpAb/AE004>  
 HA (E10176EF, Covance), WB 1:1000, PLA 1:250  
<https://www.biolegend.com/nl-be/products/anti-ha-11-epitope-tag-antibody-11071>  
 PCNA (SC-56, Santa Cruz), WB 1:1000, PLA 1:250  
<https://www.scbt.com/p/pcna-antibody-pc10>  
 PCNA (10205, Proteintech), PLA 1:250  
<https://www.ptglab.com/products/PCNA-Antibody-10205-2-AP.htm>  
 PCNA K164Ub (13439, Cell Signaling Technology), PLA 1:250  
<https://www.cellsignal.com/products/primary-antibodies/ubiquityl-pcna-lys164-d5c7p-rabbit-mab/13439>  
 γH2AX (05636, Upstate), PLA 1:250  
<https://www.sigmaaldrich.com/US/en/product/mm/05636>  
 γH2AX (07164, Upstate), PLA 1:250  
<https://www.sigmaaldrich.com/US/en/product/mm/07164>  
 RAD51 (05-530-I, Santa Cruz), PLA 1:250  
<https://www.scbt.com/p/rad51-antibody-3c10>  
 53BP1 (NB100-305, Novus Biologicals), WB 1:1000  
[https://www.novusbio.com/products/53bp1-antibody\\_nb100-305](https://www.novusbio.com/products/53bp1-antibody_nb100-305)  
 PRIM1 (10773-1-AP, Proteintech), WB 1:1000  
<https://www.ptglab.com/products/PRIM1-Antibody-10773-1-AP.htm>  
 RPA2 (NA19L, Calbiochem), WB 1:1000  
[https://www.emdmillipore.com/US/en/product/Anti-Replication-Protein-A-Antibody-clone-RPA34-20,MM\\_NF-MABE285](https://www.emdmillipore.com/US/en/product/Anti-Replication-Protein-A-Antibody-clone-RPA34-20,MM_NF-MABE285)  
 SMARCAD1 (A5850, Abclonal), WB 1:1000  
<https://abclonal.com/catalog-antibodies/SMARCAD1RabbitAb/A5850>  
 KU70 (E-5, SC-17789, Santa Cruz Biotechnology), WB 1:1000  
<https://www.scbt.com/p/ku70-antibody-e-5>

## Eukaryotic cell lines

Policy information about [cell lines and Sex and Gender in Research](#)

|                                                                   |                                                                                                                                                                                                                        |
|-------------------------------------------------------------------|------------------------------------------------------------------------------------------------------------------------------------------------------------------------------------------------------------------------|
| Cell line source(s)                                               | U2OS (human osteosarcoma) and HEK293T cells were obtained from the ATTC cell repository. RPE-1 cells sensitive to puromycin were received from Dr. Stephen P. Jackson's lab. UWB1 was received from Dr. Lee Zou's lab. |
| Authentication                                                    | U2OS and HEK293T are authenticated by ATTC. RPE-1 is authenticated by Dr. Stephen P. Jackson's lab and we confirmed the sensitivity to puromycin. UWB1 is authenticated by Dr. Lee Zou's lab.                          |
| Mycoplasma contamination                                          | All cells tested negative.                                                                                                                                                                                             |
| Commonly misidentified lines (See <a href="#">ICLAC</a> register) | No                                                                                                                                                                                                                     |

## Flow Cytometry

### Plots

Confirm that:

- The axis labels state the marker and fluorochrome used (e.g. CD4-FITC).
- The axis scales are clearly visible. Include numbers along axes only for bottom left plot of group (a 'group' is an analysis of identical markers).
- All plots are contour plots with outliers or pseudocolor plots.
- A numerical value for number of cells or percentage (with statistics) is provided.

### Methodology

|                           |                                                                                                                                                                                                                                                                                                                                                                        |
|---------------------------|------------------------------------------------------------------------------------------------------------------------------------------------------------------------------------------------------------------------------------------------------------------------------------------------------------------------------------------------------------------------|
| Sample preparation        | EGFP reporter cell lines were used for the FACS analysis. 5 days post cleavage by I-SceI or Cas9-gRNA, adherent cells were trypsinized and collected. Cells were then washed with 2ml of PBS and cell pellets were re-suspended with 500µl of PBS. Re-suspended cells were transferred to the 12 X 75mm polystyrene round bottom test tube (Falcon) for FACS analysis. |
| Instrument                | BD Accuri C6 flow cytometer                                                                                                                                                                                                                                                                                                                                            |
| Software                  | BD Accuri C6 Software                                                                                                                                                                                                                                                                                                                                                  |
| Cell population abundance | N/A                                                                                                                                                                                                                                                                                                                                                                    |
| Gating strategy           | P1: Alive cells were chosen for analysis after doublet discrimination by detection of disproportions between cell size (FSC-A) vs. cell signal (FSC-H).<br>P2: Set the gate using nonfluorescent cells as a control. GFP-positive cells can be detected outside of the negative population of cells measured with a 488-530 nm laser.                                  |

Tick this box to confirm that a figure exemplifying the gating strategy is provided in the Supplementary Information.





This checklist template is licensed under a Creative Commons Attribution 4.0 International License, which permits use, sharing, adaptation, distribution and reproduction in any medium or format, as long as you give appropriate credit to the original author(s) and the source, provide a link to the Creative Commons license, and indicate if changes were made. The images or other third party material in this article are included in the article's Creative Commons license, unless indicated otherwise in a credit line to the material. If material is not included in the article's Creative Commons license and your intended use is not permitted by statutory regulation or exceeds the permitted use, you will need to obtain permission directly from the copyright holder. To view a copy of this license, visit <http://creativecommons.org/licenses/by/4.0/>

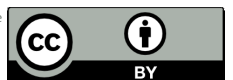

Supplement: 41467_2024_52916_MOESM6_ESM.pdf [file 41467_2024_52916_MOESM6_ESM.pdf]
