# Supplementary material for: 53BP1 deficiency leads to hyperrecombination using break-induced replication (BIR)
Source: PubMed Central journal article supplement — Nat Commun. 2024 Oct 5;15:8648. doi: 10.1038/s41467-024-52916-z (PMC11455893; doi:10.1038/s41467-024-52916-z), 2024-10-05
Supplement: 41467_2024_52916_MOESM3_ESM.pdf [file 41467_2024_52916_MOESM3_ESM.pdf]

## Description of Additional Supplementary Files

**File Name:** Supplementary Data 1

**Description:** List of shRNA sequences used in this study

**File Name:** Supplementary Data 2

**Description:** List of RT-qPCR primers used in this study
